# Supplementary material for: Alleviation of neuropathic pain with neuropeptide Y requires spinal Npy1r interneurons that coexpress Grp
Source: JCI Insight. 2023 Nov 22;8(22):e169554. doi: 10.1172/jci.insight.169554 (PMC10721324; doi:10.1172/jci.insight.169554)
Supplement: Supplemental data [file jciinsight-8-169554-s009.pdf]

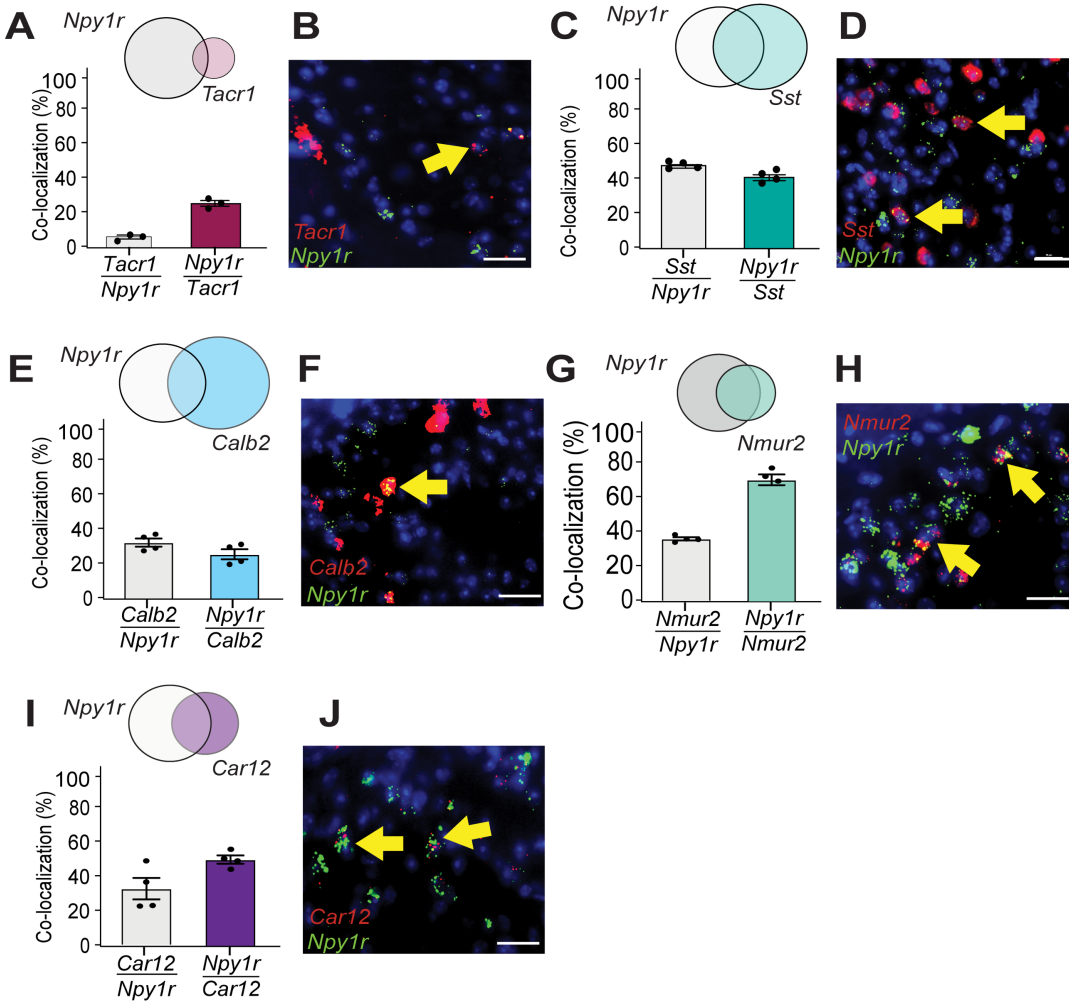

**Supplemental Figure 1. Co-localization of *Npy1r* with additional mRNAs**

(**A-B**) *Npy1r* in laminae I-II co-localizes with *Tacr1* (*Tacr1/Npy1r* -  $6.94 \pm 1.11\%$ ; *Npy1r/Tacr1* -  $28.34 \pm 1.71\%$ ), (**C-D**) *Sst* (*Sst/Npy1r* -  $49.26 \pm 0.98\%$ ; *Npy1r/Sst* -  $42.98 \pm 1.67\%$ ), (**E-F**) *Calb2* (*Calb2/Npy1r* -  $33.96 \pm 2.42\%$ ; *Npy1r/Calb2* -  $24.94 \pm 2.81\%$ ), (**G-H**) *Nmur2* (*Nmur2/Npy1r* -  $37.04 \pm 0.94\%$ ; *Npy1r/Nmur2* -  $72.50 \pm 3.24\%$ ), and (**I-J**) *Car12* (*Car12/Npy1r* -  $32.83 \pm 6.33\%$ ; *Npy1r/Car12* -  $50.42 \pm 2.39\%$ ) (n=3-5 mice/group).

Each data point indicates the average of 2-4 quantified sections/mouse. Scale bars: 25  $\mu\text{m}$ .

Yellow arrows indicate co-localization. Data shown as mean  $\pm$  SEM.

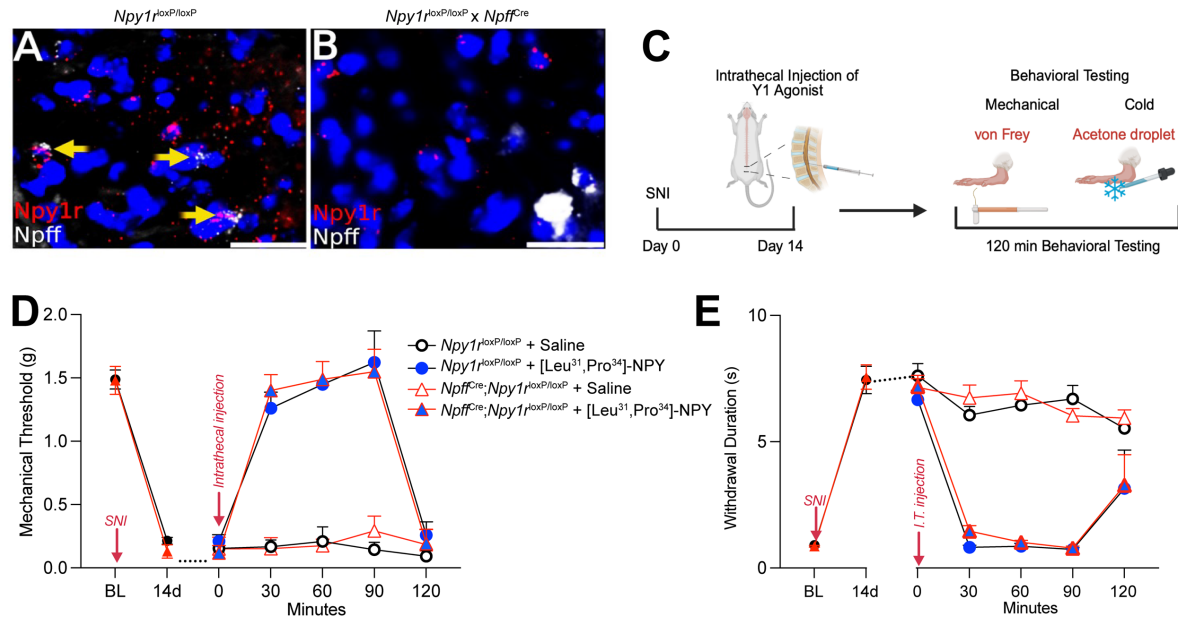

**Supplemental Figure 2. *Npff*/*Npy1r*-INs do not contribute to the inhibition of nerve injury-induced mechanical and cold allodynia by a Y1 agonist.**

**(A-B)** Confirmation of conditional deletion of *Npy1r*. Fluorescence *in situ* hybridization of sections of the lumbar spinal cord demonstrate that *Npy1<sup>loxP/loxP</sup>* mice contain DH neurons that co-express *Npy1r* and *Npff*. Conversely, *Npy1<sup>loxP/loxP</sup>;Npff<sup>Cre</sup>* mice lack expression of *Npy1r* in *Npff*-expressing neurons. Yellow arrows indicate co-localization. Scale bars: 25  $\mu$ m.

**(C)** Experimental timeline for SNI, intrathecal pharmacology, and mechanical (von Frey) and cold (acetone droplet withdrawal) behavioral testing.

**(D)** [Leu<sup>31</sup>, Pro<sup>34</sup>]-NPY abolished SNI-induced mechanical allodynia in *Npy1<sup>loxP/loxP</sup>* and *Npy1<sup>loxP/loxP</sup>;Npff<sup>Cre</sup>* mice (n=5 mice/group). Three-way RM ANOVA: Time x Genotype x Drug, F (4,64) = 0.5068, P=0.7309).

**(E)** [Leu<sup>31</sup>, Pro<sup>34</sup>]-NPY abolished SNI-induced cold allodynia in *Npy1<sup>loxP/loxP</sup>* and *Npy1<sup>loxP/loxP</sup>;Npff<sup>Cre</sup>* mice (n=5 mice/group). Three-way RM ANOVA: Time x Genotype x Drug, F (4,64) = 0.3723, P=0.8276).

Data shown as mean  $\pm$  SEM.

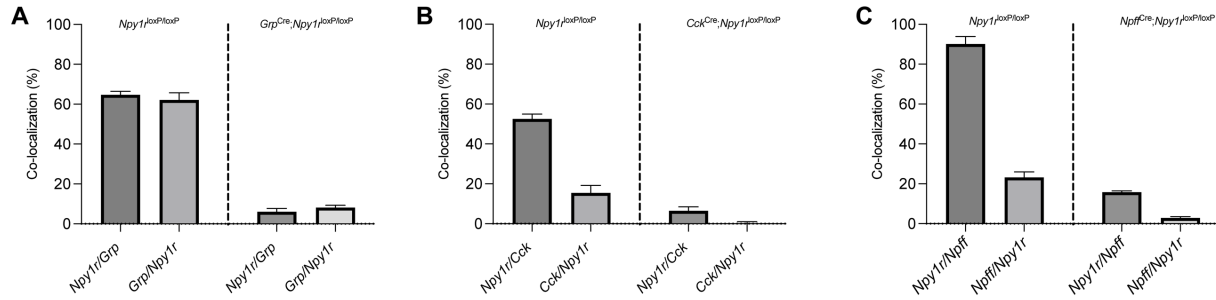

**Supplemental Figure 3. Fluorescence *in situ* hybridization confirmation of *Npy1r* knockout in conditional genetic knockout crosses.**

Confirmation of conditional deletion of *Npy1r*. Fluorescence *in situ* hybridization in sections of the lumbar spinal cord demonstrate that *Npy1r* is robustly downregulated in *Grp*-expressing neurons from *Npy1<sup>loxP/loxP</sup>;Grp<sup>Cre</sup>*, *Cck*-expressing neurons from *Npy1<sup>loxP/loxP</sup>;Cck<sup>Cre</sup>*, and *Npff*-expressing neurons from *Npy1<sup>loxP/loxP</sup>;Npff<sup>Cre</sup>* mice. (n=1 section each from 3 mice/group).

Data shown as mean  $\pm$  SD.

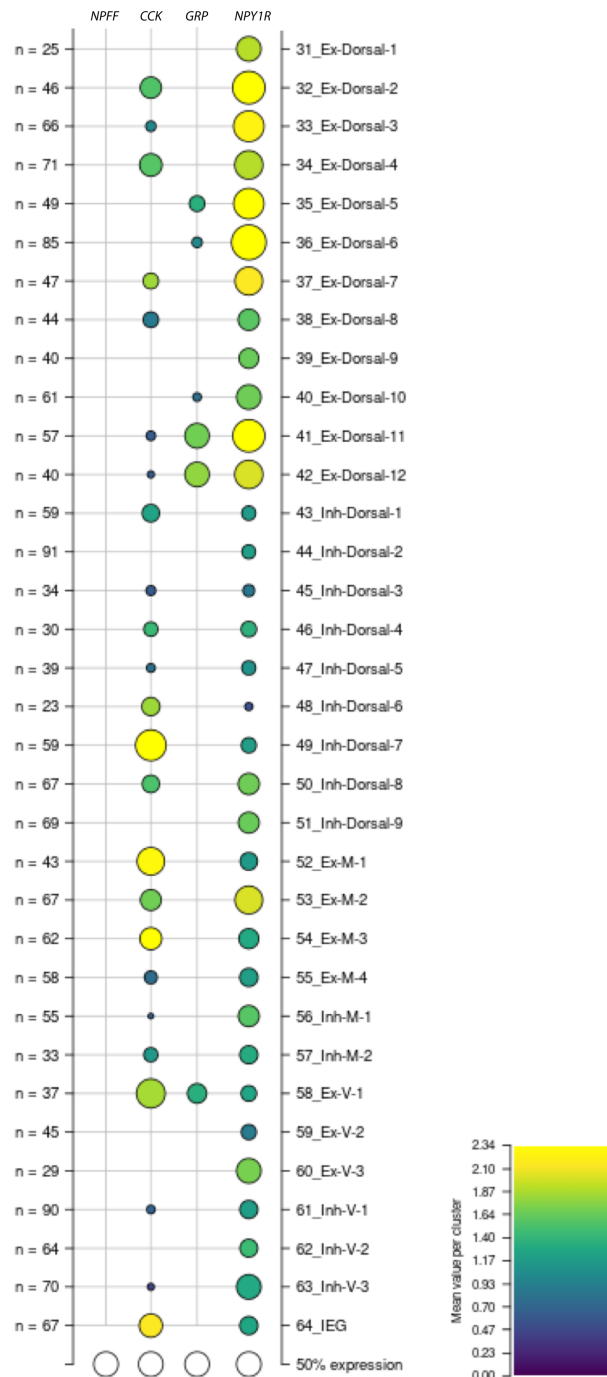

**Supplemental Figure 4. Single-nucleosome RNA-sequencing detection of *NPY1R*, *GRP*, *CCK* and *NPFF* in the human lumbar spinal cord.**

Dot plot showing the average gene expression for *NPY1R*, *CCK*, *NPFF*, and *GRP* for each human spinal cord cluster identified using single-nucleus RNA sequencing. Data analyzed from <https://vmenon.shinyapps.io/humanspinalcord/> stemming from (82).
